# Supplementary material for: Paroxetine Attenuates Cardiac Hypertrophy Via Blocking GRK2 and ADRB1 Interaction in Hypertension
Source: PubMed Central journal article supplement — J Am Heart Assoc. 2020 Dec 29;10(1):e016364. doi: 10.1161/JAHA.120.016364 (PMC7955481; doi:10.1161/jaha.120.016364), 2020-12-29
Supplement: JAH3-10-e016364-s001.pdf [file JAH3-10-e016364-s001.pdf]

# **Supplemental Material**

## **Data S1.**

### **Inclusion and Exclusion Criteria**

The first study was prospectively performed in the Third Xiangya Hospital, Changsha, China, from January 2017 to November 2018. The inclusion criteria were as follows:

1) age over 18 years old; 2) diagnosed essential hypertension; Those who had no history of diabetes, cancer, severe hepatic or renal dysfunction, acute coronary syndrome (ACS), myocardial infarction (MI), or recent surgery were excluded.

The second study included 26 children with congenital heart disease (mean age=  $5.44 \pm 3.82$ ) who underwent cardiac thoracic surgery or cardiovascular interventional treatment at the Xiangya Third Hospital from January 2016 to November 2016. Those without completed general information and biological samples were excluded.

The third study included male patients > 18 years old with essential hypertension and depression who visited the Second Xiangya Hospital from January 2017 to March 2019. The exclusion criteria were consistent with the first study.

**Table S1. Primer sequences of identification in ADRB1 KO rats.**

| Primer                  | Sequence            | Length |
|-------------------------|---------------------|--------|
| Rat-Adrb1-Tal1-check-F1 | GAACCCTGCAACCTGTCGT | 708bp  |
| Rat-Adrb1-Tal1-check-R1 | CACCCGGAGGTACACGAA  |        |

**Table S2. PCR primers.**

| Gene           | Forward Primer               | Reverse Primer               |
|----------------|------------------------------|------------------------------|
| BNP Rat        | AGTCTCCAGAACAATCCAC<br>GATGC | CCGGAAGGCGCTGTCTTGA<br>G     |
| Collagen I Rat | TGTTGGTCCTGCTGGCAAG<br>AATG  | GTCACCTTGTTTCGCCTGTCT<br>CAC |
| Ctgf Rat       | CACCGCACAGAACCACCA<br>CAC    | GGCAGGCACAGGTCTTGAT<br>GAAC  |
| MHC Rat        | GGTTCATCGCTGTCGGCTA<br>CG    | TGGCGATCTGTGTCTCCTCC<br>TC   |
| GAPDH Rat      | GACATGCCGCCTGGAGAAA          | CAGCCCAGGATGCCCTTTAG<br>T    |

**Table S3. Baseline characteristics of all participants.**

| Parameters               | normotensive<br>(n=24) | patients with<br>pre-HBP<br>(n=24) | patients with HBP<br>(n=24) | P value |
|--------------------------|------------------------|------------------------------------|-----------------------------|---------|
| age (years)              | 40.42 ± 10.78          | 34.58 ± 6.02                       | 43.00 ± 11.29               | 0.24    |
| BMI (kg/m <sup>2</sup> ) | 23.64 ± 2.52           | 25.11 ± 3.24                       | 26.22 ± 2.76                | 0.68    |
| SBP (mmHg)               | 118.88 ± 5.59          | 133.08 ± 3.00                      | 147.20 ± 5.17               | <0.01   |
| DBP (mmHg)               | 74.06 ± 6.22           | 82.92 ± 4.52                       | 87.20 ± 14.55               | <0.01   |
| HR (min <sup>-1</sup> )  | 81.55 ± 12.75          | 80.00 ± 6.47                       | 90.60 ± 12.03               | 0.21    |
| HDL-C (mg/dL)            | 1.33 ± 0.20            | 1.28 ± 0.18                        | 1.32 ± 0.11                 | 0.73    |
| LDL-C (mg/dL)            | 2.88 ± 0.84            | 2.47 ± 0.46                        | 2.45 ± 0.79                 | 0.21    |
| TG (mg/dL)               | 1.66 ± 0.88            | 1.97 ± 1.38                        | 2.35 ± 1.43                 | 0.35    |
| FPG (mmol/L)             | 5.50 ± 1.35            | 5.47 ± 0.33                        | 6.05 ± 1.32                 | 0.61    |
| HGB (g/L)                | 154.39 ± 17.18         | 157.92 ± 5.90                      | 157.00 ± 9.95               | 0.76    |
| ALT (U/L)                | 26.88 ± 14.70          | 35.50 ± 13.29                      | 30.40 ± 14.82               | 0.41    |
| AST (U/L)                | 20.33 ± 4.82           | 23.43 ± 5.50                       | 20.25 ± 6.18                | 0.30    |
| TB (umol/L)              | 12.40 ± 4.26           | 8.84 ± 2.15                        | 11.36 ± 2.22                | 0.04    |
| BUN (mmol/L)             | 4.99 ± 1.28            | 4.55 ± 1.30                        | 5.30 ± 1.10                 | 0.47    |
| Cre (umol/L)             | 81.03 ± 12.58          | 81.17 ± 9.14                       | 87.00 ± 10.15               | 0.52    |

The data represent mean ± standard deviation, P value is shown compared to the normal population by chi-square test. BMI, body mass index; SBP, systolic blood pressure; DBP, diastolic blood pressure; HR, heart rate; HDL-C, high density lipoprotein-cholesterol; LDL-C, low density lipoprotein-cholesterol; TG, triglyceride; FPG, fasting plasma glucose; HGB, hemoglobin; ALT, glutamic-pyruvic transaminase; AST, glutamic oxaloacetic transaminase; TB, total bilirubin; BUN, blood urea nitrogen; Cre, creatinine.

**Table S4. The primers and illustration for the plasmid and vectors.**

|                                     | Primer name   | Sequence 5'---3'                                         |
|-------------------------------------|---------------|----------------------------------------------------------|
| pmCherry-N1-flag-ADRB1              | flag-ADRB1-f1 | ATGGGCGCGGGGGTGCT<br>CGT                                 |
|                                     | flag-ADRB1-f2 | ATGGACTACAAGGATGA<br>CGACGACAAGGGA                       |
|                                     | flag-ADRB1-r  | CACCTTGGATTCCGAGG<br>CGAA                                |
| pHBLV-CMV-MCS-3flag-<br>EF1-ZsGreen | h-GRK2-E/B-F  | AGGATCTATTTCCGGTGA<br>ATTCGCCACCATGGCGG<br>ACCTGGAGGCGGT |
|                                     | h-GRK2-E/B-R  | AGTCACTTAAGCTTGGT<br>ACCGAGGATCCGAGGCC<br>GTTGGCACTGCCGC |

**Table S5. Nucleotide sequence of tags.**

| Tag      | Sequence 5'---3'                          |
|----------|-------------------------------------------|
| V5-tag   | GGTAAGCCTATCCCTAACCTCTCCTCGGTCTCGATTCTACG |
| Flag-Tag | GATTACAAGGATGACGACGATAAG                  |

**Table S6. The siRNA and shRNA sequence.**

| siRNA   | Sequence 5'---3'          |
|---------|---------------------------|
| Control | TTCTCCGAACGTGTCACGTAA     |
| SiGRK2  | TGCCCATTCATTGTCTGCATGTCAT |

  

| shRNA   | Top strand                                                                          | Bottom strand                                                                      |
|---------|-------------------------------------------------------------------------------------|------------------------------------------------------------------------------------|
| Control | GATCCGTTCTCCGAACGTGT<br>CACGTAATTCAAGAGATTAC<br>GTGACACGTTTCGGAGAATT<br>TTTTC       | AATTGAAAAAATTCTCCGAACG<br>TGTCACGTAATCTCTTGAATTAC<br>GTGACACGTTTCGGAGAACG          |
| ShGRK2  | GATCCGTGCCCATTCATTGT<br>CTGCATGTCATTCAAGAGA<br>ATGACATGCAGACAATGAAT<br>GGGCATTTTTTG | AATTCAAAAAATGCCCATTCATT<br>GTCTGCATGTCATTCTCTTGA<br>TGACATGCAGACAATGAATGGG<br>CACG |



**Table S7. Baseline characteristics of patients with congenital heart disease(n=19).**

| Parameters               | n=19           |
|--------------------------|----------------|
| age (years)              | 5.44 ± 3.82    |
| Male (n (%))             | 13(68.4%)      |
| BMI (kg/m <sup>2</sup> ) | 16.33 ± 2.94   |
| SBP (mmHg)               | 105.65 ± 15.54 |
| DBP (mmHg)               | 68.72 ± 9.93   |
| HR (min <sup>-1</sup> )  | 97.03 ± 18.35  |
| HDL-C (mg/dL)            | 1.02 ± 0.05    |
| LDL-C (mg/dL)            | 2.42 ± 0.26    |
| TG (mg/dL)               | 1.53 ± 0.25    |
| FPG (mmol/L)             | 4.95 ± 0.33    |
| HGB (g/L)                | 134.04 ± 13.72 |
| ALT (U/L)                | 14.56 ± 4.24   |
| AST (U/L)                | 5.44 ± 3.82    |
| TB (umol/L)              | 13.71 ± 4.54   |
| BUN (mmol/L)             | 4,34 ± 1.34    |
| Cre(umol/L)              | 35.24 ± 15.28  |

Statistics represent mean ± standard deviation

BMI, body mass index; SBP, systolic blood pressure; DBP, diastolic blood pressure; HR, heart rate; HDL-C, high density lipoprotein-cholesterol; LDL-C, low density lipoprotein-cholesterol; TG, triglyceride; FPG, fasting plasma glucose; HGB, hemoglobin; ALT, glutamic-pyruvic transaminase; AST, glutamic oxaloacetic transaminase; TB, total bilirubin; BUN, blood urea nitrogen; Cre, creatinine; UA, uric acid; PRO, urinary protein.

**Table S8. Changes of SBP and HR in WKY rats with different treatments.**

## A.SBP in WKY rats with different treatments(mmHg)

| Age   | WKY<br>Control | WKY+<br>Paroxetine | WKY+<br>Metoprolol | WKY+<br>Met+Par | WKY+<br>Amlodipine |
|-------|----------------|--------------------|--------------------|-----------------|--------------------|
| 10wks | 126.27±4.38    | 125.28±4.46        | 126.37±2.46        | 126.14±3.67     | 127.12±4.26        |
| 12wks | 126.67±5.13    | 126.47±4.48        | 126.38±1.13        | 126.39±3.19     | 126.27±5.11        |
| 14wks | 126.62±4.48    | 127.17±3.53        | 126.87±2.01        | 126.22±4.12     | 126.78±4.27        |
| 16wks | 126.74±4.63    | 127.05±3.13        | 127.34±4.23        | 125.18±4.34     | 127.67±6.54        |
| 18wks | 127.69±5.04    | 126.93±4.34        | 126.37±5.52        | 127.67±2.13     | 127.35±4.37        |
| 20wks | 126.94±3.83    | 127.62±5.64        | 126.88±1.25        | 128.45±4.87     | 128.67±3.83        |
| 22wks | 127.64±4.33    | 127.87±4.26        | 127.65±2.13        | 128.67±5.23     | 128.67±5.33        |

## B.HR in WKY rats with different treatments(bmp)

| Age   | WKY<br>Control | WKY+<br>Paroxetine | WKY+<br>Metoprolol | WKY+<br>Met+Par | WKY+<br>Amlodipine |
|-------|----------------|--------------------|--------------------|-----------------|--------------------|
| 10wks | 321.42±14.31   | 326.34±13.43       | 328.35±12.36       | 325.14±14.67    | 323.12±13.35       |
| 12wks | 322.26±9.43    | 326.34±11.49       | 326.13±11.15       | 329.39±11.47    | 326.63±11.36       |
| 14wks | 319.32±11.78   | 332.17±10.23       | 326.87±12.35       | 326.55±12.12    | 325.64±12.44       |
| 16wks | 310.24±14.24   | 325.26±12.56       | 328.34±9.79        | 325.57±13.54    | 327.35±13.24       |
| 18wks | 324.49±12.02   | 326.93±14.36       | 330.37±10.52       | 332.67±12.24    | 330.35±9.32        |
| 20wks | 329.34±11.83   | 331.62±9.64        | 326.73±10.35       | 329.59±11.46    | 332.43±15.03       |
| 22wks | 330.35±13.23   | 326.87±8.23        | 327.65±9.96        | 328.67±9.78     | 330.67±10.33       |

Figure S1. ADRB1 KO rats.

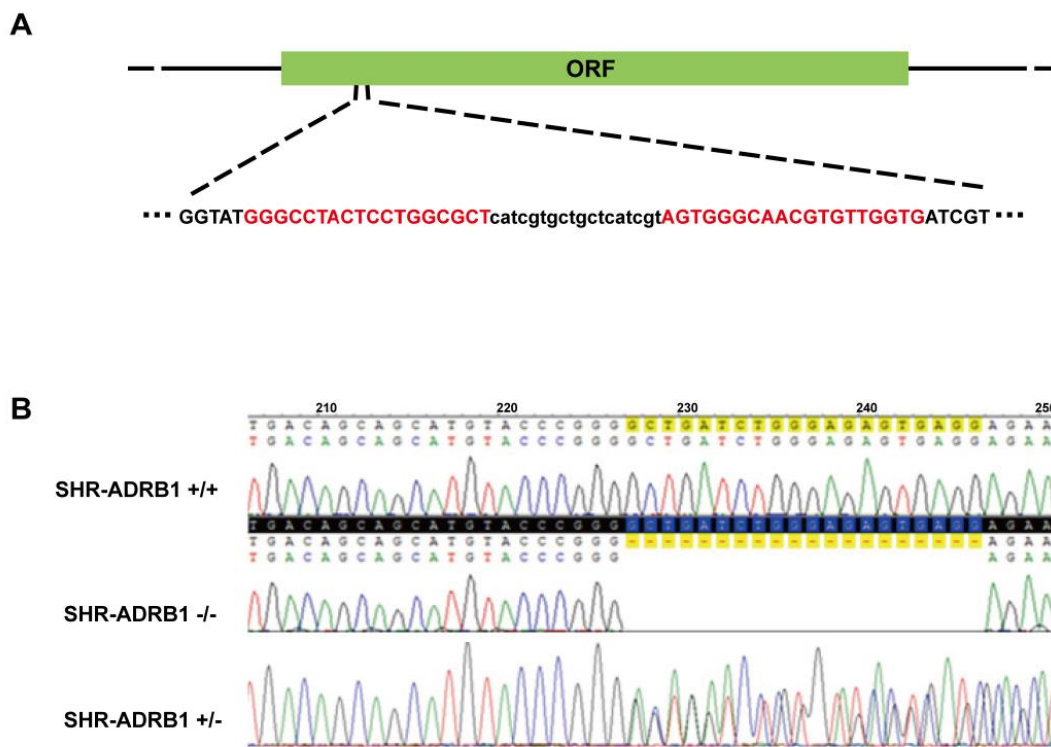

**A.** The red font is underlined to indicate the target sequence of TALEN, the lowercase font is the spacer sequence, the system generates a DNA double-strand break at the spacer, and then the cell uses its own non-homologous recombination repair mechanism without providing a repair template. When repairing, nucleotide insertions or deletions may be introduced during the repair process, which may cause frameshift mutations in the gene and eventually lead to inactivation of the target gene. **B.** Comparative map of PCR results of three genotypes, including ADRB1<sup>+/+</sup>, ADRB1<sup>-/-</sup>, and ADRB1<sup>+/-</sup> in SHR rats. There is no bimodal or chaotic peak phenomenon, and it is completely continuous with the target sequence in SHR-ADRB1<sup>+/+</sup> rats. There is a gene deletion, which is homozygote knockout rat (SHR-ADRB1<sup>-/-</sup>) while there are bimodal phenomena near the recognition sequence in SHR-ADRB1<sup>+/-</sup> rats.

**Figure S2. Expressions of ADRB1 and GRK2 in WKY.**

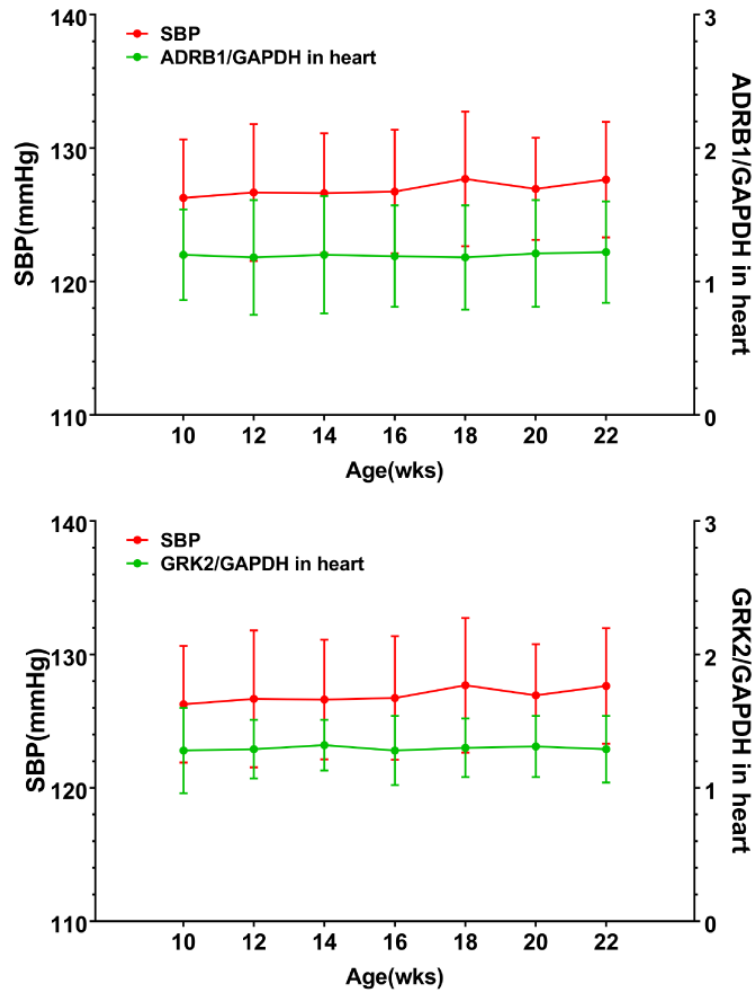

The relative mRNA expressions of ADRB1 and GRK2 in the myocardium (n=6) and dynamic change in SBP (n=6) from 10-week to 22-week of age in WKY. Data are presented as the means  $\pm$  SD.

**Figure S3. Dobutamine enhances the interaction between GRK2 and ADRB1.**

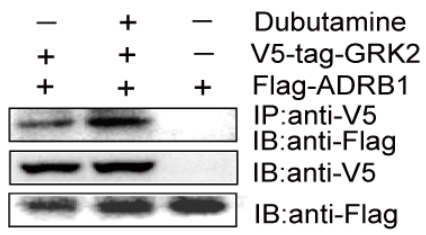

Representative immunoblots confirming dobutamine enhance the interaction between V5-tag-GRK2 and Flag-ADRB1.

**Figure S4. Changes of SBP in SHR rats with amlodipine.**

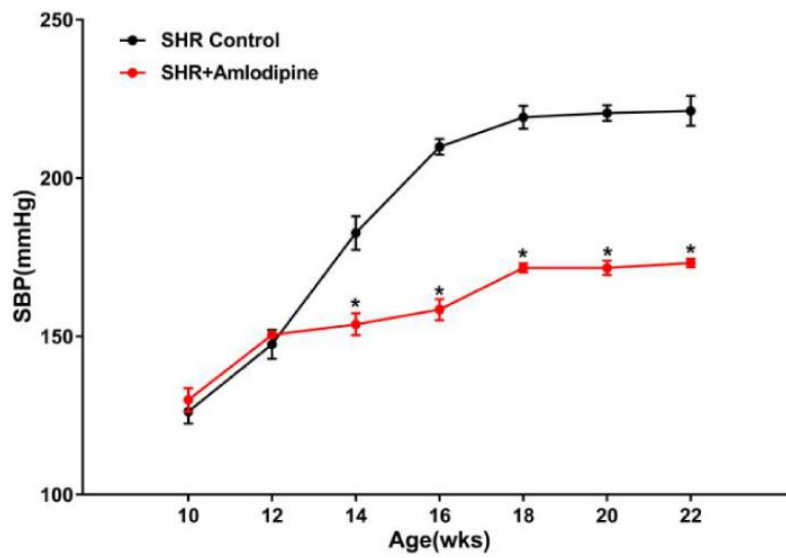

The dynamic change in systolic blood pressure of SHR and SHR treated with amlodipine at the age from 10 to 22 weeks. Data are presented as the means  $\pm$  SD. \*P<0.05 compared with the controls.

**Figure S5. GRK2 promotes epinephrine induced cardiomyocyte hypertrophy in rat cardiomyocytes.**

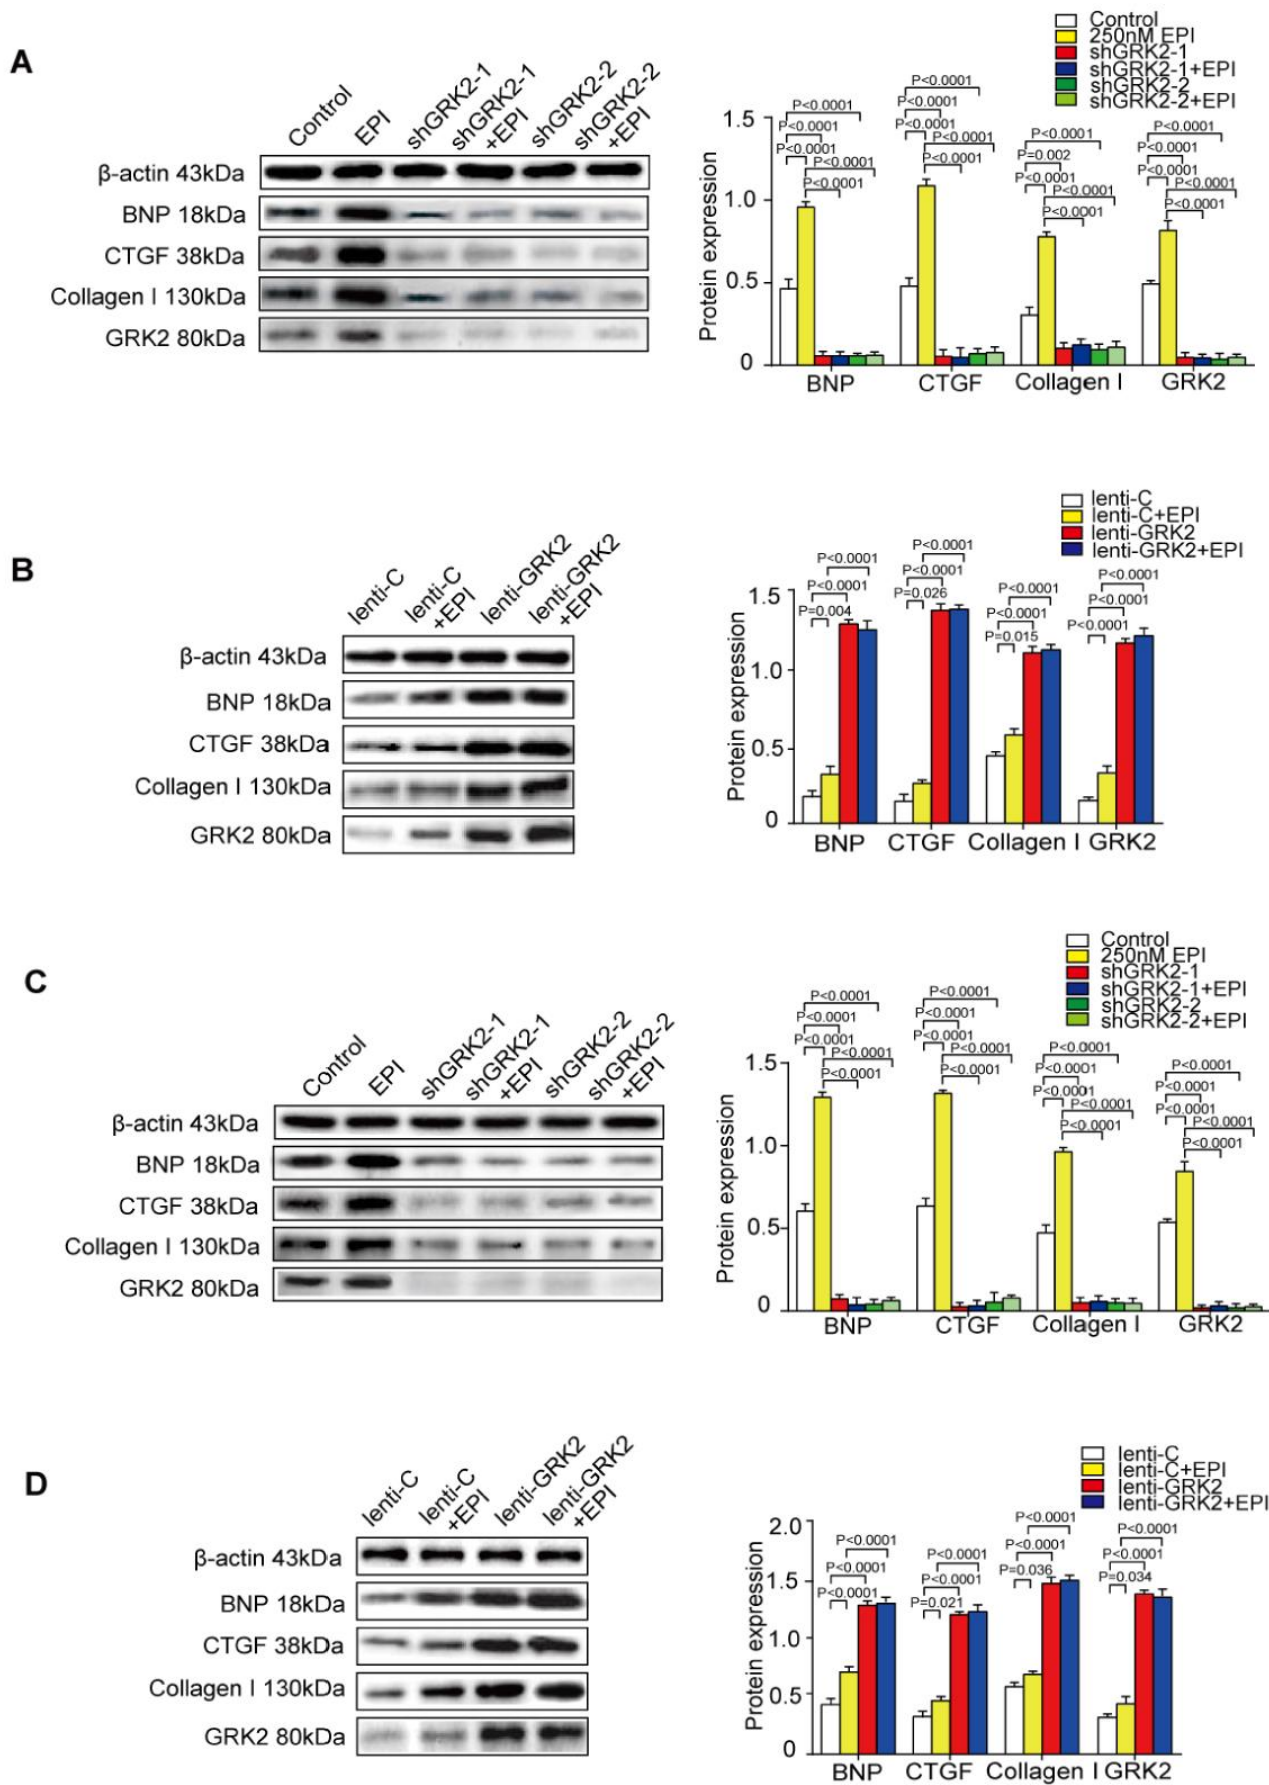

**A.** Immunoblots (left) and quantification (right) of expression levels of  $\beta$ -actin, BNP, CTGF, collagen I and GRK2 in cultured H9C2 cells infected with the indicated recombinant adenovirus with or without stimulation by epinephrine (n=4 samples per group). **B.** Representative western blots and the bar graphs presenting the quantitative data for  $\beta$ -actin, BNP, CTGF, collagen I and GRK2 in the indicated groups of H9C2 cells (n=4 samples per group). **C.** Immunoblots (left) and quantification (right) of expression levels of  $\beta$ -actin, BNP, CTGF, collagen I and GRK2 in cultured primary rat cardiomyocytes infected with the indicated recombinant adenovirus with or without stimulation by epinephrine (n=4 samples per group). **D.** Representative western blots and the bar graphs presenting the quantitative data for  $\beta$ -actin, BNP, CTGF, collagen I and GRK2 in the indicated groups of primary rat cardiomyocytes (n=4 samples per group). Data shown are mean  $\pm$  SD (A-D). Data were first analyzed and passed normality test (Shapiro-Wilk test in A-D). P values were shown and assessed by one-way ANOVA with Tukey's test (A-D). EPI: epinephrine. All data are shown as the mean  $\pm$  SD.
